# Supplementary material for: Vision-related quality of life considering both eyes: results from the German population-based Gutenberg Health Study (GHS)
Source: PubMed Central journal article supplement (PMC6554962; doi:10.1186/s12955-019-1158-1), 2019-06-06
Supplement: 12955_2019_1158_MOESM1_ESM.pdf [file 12955_2019_1158_MOESM1_ESM.pdf]

## Supplementary tables

**Additional file 1: Table S1:** Characteristics of the study sample of the German population-based Gutenberg Health Study (GHS) with visual acuity of both eyes and NEI VFQ-25 data available, stratified by sex.

|                                              | Men                | Women              |
|----------------------------------------------|--------------------|--------------------|
| <b>n</b>                                     | 50.1% (5983)       | 49.9% (5958)       |
| <b>Age [y]</b>                               | 55.1 (11.1)        | 54.4 (11.1)        |
| <b>Socio-economic status</b>                 | 13.9 (4.5)         | 12.4 (4.1)         |
| <b>Eye characteristics:</b>                  |                    |                    |
| <b>Mean spherical equivalent [dpt]</b>       | -0.12 (-1.25/0.75) | -0.06 (-1.19/0.88) |
| <b>Visual acuity (better eye) [logMAR]</b>   | 0 (0/0.10)         | 0 (0/0.10)         |
| <b>Visual acuity (worse eye) [logMAR]</b>    | 0 (0/0.10)         | 0.10 (0/0.22)      |
| <b>Contact lenses or glasses</b>             | 88.1% (5271)       | 90.2% (5375)       |
| <b>Distance glasses</b>                      | 66.7% (3989)       | 69.3% (4127)       |
| <b>History of eye surgery</b>                | 6.9% (412)         | 7.8% (464)         |
| <b>Glaucoma</b>                              | 2.2% (133)         | 2.3% (137)         |
| <b>Age-related macular degeneration</b>      | 0.4% (25)          | 0.4% (26)          |
| <b>Amblyopia</b>                             | 10.0% (600)        | 9.8% (586)         |
| <b>Vision-related quality of life:</b>       |                    |                    |
| <b>Visual functioning scale (NEI VFQ-25)</b> | 89.6 (81.5/95.1)   | 89.5 (78.8/94.5)   |
| <b>Socioemotional scale (NEI VFQ-25)</b>     | 100.0 (94.6/100.0) | 100.0 (94.2/100.0) |
| <b>Comorbidities:</b>                        |                    |                    |
| <b>Cardiovascular disease</b>                | 12.1% (726)        | 5.3% (315)         |
| <b>Peripheral artery disease</b>             | 3.2% (191)         | 2.9% (170)         |
| <b>Diabetes mellitus</b>                     | 10.8% (648)        | 6.1% (360)         |
| <b>Chronic kidney disease</b>                | 1.2% (71)          | 1.0% (57)          |
| <b>Chronic liver disease</b>                 | 0.5% (32)          | 0.9% (51)          |
| <b>Chronic obstructive pulmonary disease</b> | 4.1% (246)         | 5.5% (329)         |
| <b>Cancer</b>                                | 8.2% (490)         | 9.9% (588)         |
| <b>Depression</b>                            | 6.0% (359)         | 9.2% (545)         |

Diabetes mellitus was defined by fulfilling one of the following criteria: diabetes mellitus diagnosed by a physician, known therapy (oral medication or insulin), or HbA1c  $\geq 6.5\%$ . Depression was defined using the Patient Health Questionnaire (PHQ-9), using a sum score threshold of  $\geq 10$ . Cardiovascular disease: History of either myocardial infarction, coronary artery disease, atrial fibrillation, chronic heart failure; chronic obstructive pulmonary disease: history of asthma bronchiale or bronchitis; continuous variables are described by mean values and standard deviation or for skewed distribution by median and inter-quartile range. Discrete variables are described by relative and absolute frequencies.
