# Supplementary material for: Vision-related quality of life considering both eyes: results from the German population-based Gutenberg Health Study (GHS)
Source: PubMed Central journal article supplement (PMC6554962; doi:10.1186/s12955-019-1158-1), 2019-06-06
Supplement: 12955_2019_1158_MOESM3_ESM.pdf [file 12955_2019_1158_MOESM3_ESM.pdf]

**Additional file 3: Table S3:** Linear regression estimates of the influence of both the better-seeing and the worse-seeing eye on the NEI VFQ-25 socio-emotional scale score in the German population-based Gutenberg Health Study (GHS), 2007-2012, restricted to participants without chronic diseases or amblyopia.

| <b>Category of visual impairment considering better-seeing and worse-seeing eye</b> | <b>Model S1<br/>(n=7964,<br/>R<sup>2</sup>=0.07):<br/>Estimate (CI)</b> | <b>Model S2<br/>(n=7940,<br/>R<sup>2</sup>=0.08):<br/>Estimate (CI)</b> | <b>Model S3<br/>(n= 10753,<br/>R<sup>2</sup>=0.09):<br/>Estimate (CI)</b> | <b>Model S4<br/>(n= 10704,<br/>R<sup>2</sup>=0.09):<br/>Estimate (CI)</b> |
|-------------------------------------------------------------------------------------|-------------------------------------------------------------------------|-------------------------------------------------------------------------|---------------------------------------------------------------------------|---------------------------------------------------------------------------|
| <b>BE no VI, WE mild VI</b>                                                         | -2.2*<br>(-2.9; -1.4)                                                   | -2.1*<br>(-2.9; -1.4)                                                   | -2.84*<br>(-3.75; -1.92)                                                  | -2.80*<br>(-3.71; -1.90)                                                  |
| <b>BE no VI, WE mild VI</b>                                                         | -4.5*<br>(-5.3; 3.8)                                                    | -4.5*<br>(-5.3; -3.8)                                                   | -8.69*<br>(-9.82; -7.56)                                                  | -8.77*<br>(-9.90; -7.65)                                                  |
| <b>BE mild VI &amp; WE mild VI</b>                                                  | -6.9*<br>(-10.4; -3.3)                                                  | -8.0*<br>(-11.7; -4.3)                                                  | -10.9*<br>(-13.4; -8.42)                                                  | -10.1*<br>(-12.6; -7.48)                                                  |
| <b>BE mild VI &amp; WE moderate/<br/>severe VI</b>                                  | -16.4*<br>(-19.5; -13.2)                                                | -16.4*<br>(-19.5; -13.2)                                                | -17.3*<br>(-20.2; -14.4)                                                  | -17.2*<br>(-20.0; -14.3)                                                  |
| <b>BE moderate/ severe VI, WE<br/>moderate/ severe VI</b>                           | -17.0*<br>(-20.4; -13.6)                                                | -16.9*<br>(-20.3; -13.5)                                                | -26.7*<br>(-30.6; -22.9)                                                  | -25.2*<br>(-29.2; -21.2)                                                  |

Model S1 restricted to participants without the following chronic diseases: diabetes mellitus, myocardial infarction, coronary artery disease, atrial fibrillation, chronic heart failure, peripheral artery disease, chronic kidney disease, chronic liver disease, asthma bronchiale, chronic bronchitis, depression, cancer; model S2 additionally adjusted for socio-economic status; model S3 restricted to participants without self-reported amblyopia, model S4 additionally adjusted for socio-economic status; CI: 95% confidence interval; \*: p<0.0001, R<sup>2</sup>: adjusted R<sup>2</sup>.
