# Supplementary material for: Vision-related quality of life considering both eyes: results from the German population-based Gutenberg Health Study (GHS)
Source: PubMed Central journal article supplement (PMC6554962; doi:10.1186/s12955-019-1158-1), 2019-06-06
Supplement: 12955_2019_1158_MOESM4_ESM.pdf [file 12955_2019_1158_MOESM4_ESM.pdf]

**Additional file 4: Table S4:** Linear regression estimates of the influence of both the better-seeing and the worse-seeing eye on the NEI VFQ-25 visual functioning scale score in the German population-based Gutenberg Health Study (GHS), 2007-2012, restricted to participants younger than 65 years (n=9015).

| <b>Category of visual impairment considering better-seeing and worse-seeing eye</b> | <b>Estimate (CI)</b> | <b>p value</b> |
|-------------------------------------------------------------------------------------|----------------------|----------------|
| <b>BE no VI, WE mild VI</b>                                                         | -6.31 (-7.58; -5.05) | < 0.0001       |
| <b>BE no VI, WE moderate/ severe VI</b>                                             | -8.23 (-9.41; -7.06) | < 0.0001       |
| <b>BE mild VI &amp; WE mild VI</b>                                                  | -21.8 (-27.2; -16.4) | < 0.0001       |
| <b>BE mild VI &amp; WE moderate/ severe VI</b>                                      | -34.4 (-39.4; -29.4) | < 0.0001       |
| <b>BE moderate/ severe VI, WE moderate/ severe VI</b>                               | -26.8 (-31.7; -22.0) | < 0.0001       |

BE: better-seeing eye; WE: worse-seeing eye; VI: vision impairment; no VI: <0.32 logMAR, mild VI: 0.32-0.5 logMAR; moderate/severe VI: >0.5 logMAR; all models adjusted for age, sex and socioeconomic status, using both eyes with no VI as reference.
