# Supplementary material for: Vision-related quality of life considering both eyes: results from the German population-based Gutenberg Health Study (GHS)
Source: Springer Nature journal article supplement (doi:10.1186/s12955-019-1158-1), 2019-06-06
Supplement: MOESM2 [file 16777438]

**Additional file 2: Table S2:** Linear regression estimates of the influence of both the better-seeing and the worse-seeing eye on the NEI VFQ-25 visual functioning scale score in the German population-based Gutenberg Health Study (GHS), 2007-2012, restricted to participants without chronic diseases or amblyopia.

| <b>Category of visual impairment considering better-seeing and worse-seeing eye</b> | <b>Model S1<br/>(n= 7964,<br/>R<sup>2</sup>=0.11):<br/>Estimate (CI)</b> | <b>Model S2<br/>(n= 7940,<br/>R<sup>2</sup>=0.11):<br/>Estimate (CI)</b> | <b>Model S3<br/>(n= 10753,<br/>R<sup>2</sup>=0.12):<br/>Estimate (CI)</b> | <b>Model S4<br/>(n= 10704,<br/>R<sup>2</sup>=0.13):<br/>Estimate (CI)</b> |
|-------------------------------------------------------------------------------------|--------------------------------------------------------------------------|--------------------------------------------------------------------------|---------------------------------------------------------------------------|---------------------------------------------------------------------------|
| <b>BE no VI, WE mild VI</b>                                                         | -5.9*<br>(-7.1; -4.8)                                                    | -5.8*<br>(-7.0; -4.7)                                                    | -5.2*<br>(-6.4; -3.9)                                                     | -5.0*<br>(-6.3; -3.7)                                                     |
| <b>BE no VI, WE moderate/ severe VI</b>                                             | -7.7*<br>(-8.9; -6.6)                                                    | -7.7*<br>(-8.9; -6.6)                                                    | -12.3*<br>(-13.9; -10.7)                                                  | -12.3*<br>(-13.9; -10.7)                                                  |
| <b>BE mild VI &amp; WE mild VI</b>                                                  | -10.4*<br>(-15.8; -5.1)                                                  | -11.9*<br>(-17.5; -6.3)                                                  | -13.9*<br>(-17.5; -10.4)                                                  | -14.2*<br>(-17.9; -10.6)                                                  |
| <b>BE mild VI &amp; WE moderate/ severe VI</b>                                      | -23.5*<br>(-28.2; -18.7)                                                 | -23.5*<br>(-28.2; -18.7)                                                 | -21.1*<br>(-25.2; -17.1)                                                  | -20.9*<br>(-24.9; -16.8)                                                  |
| <b>BE moderate/ severe VI, WE moderate/ severe VI</b>                               | -22.2*<br>(-27.5; -17.2)                                                 | -22.3*<br>(-27.4; -17.1)                                                 | -33.7*<br>(-39.2; -28.2)                                                  | -32.9*<br>(-38.6; -27.2)                                                  |

Model S1 restricted to participants without the following chronic diseases: diabetes mellitus, myocardial infarction, coronary artery disease, atrial fibrillation, chronic heart failure, peripheral artery disease, chronic kidney disease, chronic liver disease, asthma bronchiale, chronic bronchitis, depression, cancer; model S2 additionally adjusted for socio-economic status; model S3 restricted to participants without self-reported amblyopia, model S4 additionally adjusted for socio-economic status; CI: 95% confidence interval; \*: p<0.0001, R<sup>2</sup>: adjusted R<sup>2</sup>.
