# Supplementary material for: Vision-related quality of life considering both eyes: results from the German population-based Gutenberg Health Study (GHS)
Source: Springer Nature journal article supplement (doi:10.1186/s12955-019-1158-1), 2019-06-06
Supplement: MOESM6 [file 16777438]

**Additional file 6: Table S6:** Linear regression estimates of the influence of both the better-seeing and the worse-seeing eye on the NEI VFQ-25 socio-emotional scale score in the German population-based Gutenberg Health Study (GHS), 2007-2012, restricted to participants younger than 65 years (n=9015).

| Category of visual impairment considering better-seeing and worse-seeing eye | Estimate (CI)        | p value  |
|------------------------------------------------------------------------------|----------------------|----------|
| <b>BE no VI, WE mild VI</b>                                                  | -1.98 (-2.84; -1.12) | < 0.0001 |
| <b>BE no VI, WE moderate/ severe VI</b>                                      | -4.72 (-5.52; -3.92) | < 0.0001 |
| <b>BE mild VI &amp; WE mild VI</b>                                           | -12.9 (-16.6; -9.21) | < 0.0001 |
| <b>BE mild VI &amp; WE moderate/ severe VI</b>                               | -22.5 (-25.9; -19.1) | < 0.0001 |
| <b>BE moderate/ severe VI, WE moderate/ severe VI</b>                        | -22.2 (-25.5; -18.9) | < 0.0001 |

BE: better-seeing eye; WE: worse-seeing eye; VI: vision impairment; no VI: <0.32 logMAR, mild VI: 0.32-0.5 logMAR; moderate/severe VI: >0.5 logMAR; all models adjusted for age, sex and socioeconomic status, using both eyes with no VI as reference.
