# Supplementary material for: Vision-related quality of life considering both eyes: results from the German population-based Gutenberg Health Study (GHS)
Source: Springer Nature journal article supplement (doi:10.1186/s12955-019-1158-1), 2019-06-06
Supplement: MOESM7 [file 16777438]

**Additional file 7: Table S7:** Linear regression estimates of the influence of both the better-seeing and the worse-seeing eye on the NEI VFQ-25 socio-emotional scale score in the German population-based Gutenberg Health Study (GHS), 2007-2012, restricted to participants 65 years and older (n=2874).

| Category of visual impairment considering better-seeing and worse-seeing eye | Estimate (CI)        | p value  |
|------------------------------------------------------------------------------|----------------------|----------|
| BE no VI, WE mild VI                                                         | -2.23 (-3.44; -1.02) | 0.00032  |
| BE no VI, WE moderate/ severe VI                                             | -8.21 (-9.72; -6.69) | < 0.0001 |
| BE mild VI & WE mild VI                                                      | -7.85 (-11.5; -4.22) | < 0.0001 |
| BE mild VI & WE moderate/ severe VI                                          | -11.9 (-15.5; -8.26) | < 0.0001 |
| BE moderate/ severe VI, WE moderate/ severe VI                               | -16.8 (-22.0; -11.7) | < 0.0001 |

BE: better-seeing eye; WE: worse-seeing eye; VI: vision impairment; no VI: <0.32 logMAR, mild VI: 0.32-0.5 logMAR; moderate/severe VI: >0.5 logMAR; all models adjusted for age, sex and socioeconomic status, using both eyes with no VI as reference.
